# Supplementary material for: Effects of plaque brachytherapy and proton beam radiotherapy on prognostic testing: a comparison of uveal melanoma genotyped by microsatellite analysis
Source: HighWire-hosted journal article supplement (doi:10.1136/bjophthalmol-2019-315363), 2020-02-05
Supplement: bjophthalmol-2019-315363supp003_data_supplement.pdf [file bjophthalmol-2019-315363supp003_data_supplement.pdf]

Supplementary Table 1. Genotype specific demographics of 407 UM genotyped by microsatellite analysis

|                                  | All Tumors (n=407) | M3 (n=97)         | D3 (n=256)         | Partial loss of 3q (n=16) | AI (n=26)         | Unclassifiable (n=12) |
|----------------------------------|--------------------|-------------------|--------------------|---------------------------|-------------------|-----------------------|
| <b>Median age at PM (years)</b>  | 61 (12 – 93)       | 65 (14 – 93)      | 59 (16 – 92)       | 60 (12 – 81)              | 62 (16 – 82)      | 57.5 (35 – 79)        |
| <b>Female</b>                    | 211                | 52                | 128                | 9                         | 16                | 5                     |
| <b>Male</b>                      | 196                | 45                | 128                | 7                         | 9                 | 7                     |
| <b>Median LBD (mm)</b>           | 11.2 (1.82 – 20.8) | 13.4 (4.4 – 20.8) | 10.5 (1.82 – 19.5) | 10.5 (5.4 – 16.1)         | 10.5 (5.8 – 18.7) | 10.7 (7.7 – 16.2)     |
| <b>Median UH (mm)</b>            | 3.1 (0.9 – 18.5)   | 4.2 (0.9 – 18.5)  | 2.7 (0.9 – 12.6)   | 3.2 (1.1 – 10.1)          | 3.0 (0.9 – 9.8)   | 2.9 (1.0 – 6.2)       |
| <b>AJCC Stage</b>                |                    |                   |                    |                           |                   |                       |
| 1                                | 186                | 20                | 136                | 8                         | 14                | 8                     |
| 2                                | 146                | 47                | 82                 | 5                         | 9                 | 3                     |
| 3                                | 59                 | 21                | 32                 | 3                         | 2                 | 1                     |
| 4                                | 16                 | 9                 | 6                  | -                         | 1                 | -                     |
| <b>Cell Type</b>                 |                    |                   |                    |                           |                   |                       |
| Epithelioid                      | 116                | 61                | 44                 | 2                         | 5                 | 4                     |
| Spindle                          | 261                | 34                | 192                | 12                        | 15                | 8                     |
| Indeterminate                    | 30                 | 2                 | 20                 | 2                         | 6                 | -                     |
| <b>Ciliary Body Involvement</b>  |                    |                   |                    |                           |                   |                       |
| Yes                              | 53                 | 20                | 24                 | 4                         | 3                 | -                     |
| No                               | 354                | 77                | 222                | 12                        | 23                | 12                    |
| <b>Extraocular Extension</b>     |                    |                   |                    |                           |                   |                       |
| Yes                              | 5                  | 3                 | 2                  | -                         | -                 | -                     |
| No                               | 402                | 94                | 254                | 16                        | 25                | 12                    |
| <b>Biopsy taken Pre/Post RXT</b> |                    |                   |                    |                           |                   |                       |
| Pre                              | 172                | 48                | 100                | 8                         | 9                 | 6                     |
| Post                             | 180                | 33                | 118                | 6                         | 15                | 6                     |
| <b>Follow-Up</b>                 |                    |                   |                    |                           |                   |                       |
| Months                           | 54 (5 – 368)       | 50 (6 – 95)       | 51.7 (5 – 170)     | 21.2 (6 – 90)             | 52.6 (9 – 92)     | 49.4 (4 – 82)         |
| <b>Status</b>                    |                    |                   |                    |                           |                   |                       |
| Alive                            | 348                | 62                | 242                | 14                        | 24                | 10                    |
| Metastatic death                 | 35                 | 27                | 5                  | 2                         | -                 | 1                     |
| Death other causes               | 20                 | 7                 | 9                  | -                         | 2                 | 1                     |
